# Supplementary material for: Development of a Chemoresistant Risk Scoring Model for Prechemotherapy Osteosarcoma Using Single-Cell Sequencing
Source: Front Oncol. 2022 May 18;12:893282. doi: 10.3389/fonc.2022.893282 (PMC9159767; doi:10.3389/fonc.2022.893282)
Supplement: Supplementary file 3 [file Table_3.xlsx]

## Sheet: os4_lr
	ligand	receptor	cell_from_mean_exprs	cell_from	cell_to_mean_exprs	cell_to	comm_type
40	HBEGF	CD82	0.640412	9	0.464774	9	growth factor
52	HBEGF	CD9	0.640412	9	0.635279	9	growth factor
330	ANXA1	FPR3	0.586929	9	1.21807	9	other
846	FN1	C5AR1	0.27521	9	1.09056	9	other
876	FN1	ITGA5	0.27521	9	0.549472	9	other
916	FN1	PLAUR	0.27521	9	1.19713	9	other
922	FN1	SDC2	0.27521	9	0.235119	9	other
1033	ICAM1	ITGAX	0.991757	9	0.933669	9	other
1392	PLAU	ITGA5	0.763456	9	0.549472	9	other
1422	PLAU	PLAUR	0.763456	9	1.19713	9	other
1544	SPP1	ITGA5	0.66344	9	0.549472	9	other
344	APOE	LDLR	0.91787	9	0.534855	14	other
852	FN1	COL13A1	0.27521	9	1.00609	14	other
923	FN1	SDC2	0.27521	9	0.708034	14	other
1382	OSM	LIFR	0.745092	9	1.67212	14	other
1418	PLAU	MRC2	0.763456	9	1.31407	14	other
55	HBEGF	CD9	0.640412	9	0.770644	21	growth factor
162	VEGFA	FLT1	0.722436	9	6.06385	21	growth factor
174	VEGFA	KDR	0.722436	9	5.77147	21	growth factor
311	ANXA1	DYSF	0.586929	9	4.36907	21	other
858	FN1	FLT4	0.27521	9	4.1386	21	other
862	FN1	ITGA2	0.27521	9	2.64421	21	other
880	FN1	ITGA5	0.27521	9	2.77825	21	other
887	FN1	ITGA6	0.27521	9	4.75641	21	other
913	FN1	NT5E	0.27521	9	1.08967	21	other
920	FN1	ROBO4	0.27521	9	5.33716	21	other
1007	ICAM1	CAV1	0.991757	9	4.11351	21	other
1396	PLAU	ITGA5	0.763456	9	2.77825	21	other
1446	PTGS2	CAV1	0.726046	9	4.11351	21	other
1548	SPP1	ITGA5	0.66344	9	2.77825	21	other
1572	SPP1	S1PR1	0.66344	9	1.98902	21	other
1022	ICAM1	IL2RG	0.991757	9	1.47541	32	other
1953	IL18	CD48	0.704658	9	1.75387	32	cytokine
321	ANXA1	FPR1	0.586929	9	2.30336	33	other
367	APOE	SORL1	0.91787	9	0.991039	33	other
847	FN1	C5AR1	0.27521	9	1.85821	33	other
879	FN1	ITGA5	0.27521	9	1.11915	33	other
917	FN1	PLAUR	0.27521	9	1.85512	33	other
1034	ICAM1	ITGAX	0.991757	9	2.03665	33	other
1395	PLAU	ITGA5	0.763456	9	1.11915	33	other
1423	PLAU	PLAUR	0.763456	9	1.85512	33	other
1547	SPP1	ITGA5	0.66344	9	1.11915	33	other
1722	VCAN	SELL	0.65816	9	2.54833	33	other
1955	IL18	CD48	0.704658	9	1.3648	33	cytokine
53	HBEGF	CD9	0.640412	9	0.555784	34	growth factor
168	VEGFA	ITGAV	0.722436	9	1.11736	34	growth factor
861	FN1	ITGA2	0.27521	9	2.42903	34	other
878	FN1	ITGA5	0.27521	9	0.671771	34	other
894	FN1	ITGAV	0.27521	9	1.11736	34	other
901	FN1	ITGB3	0.27521	9	3.44081	34	other
1394	PLAU	ITGA5	0.763456	9	0.671771	34	other
1404	PLAU	ITGAV	0.763456	9	1.11736	34	other
1546	SPP1	ITGA5	0.66344	9	0.671771	34	other
1561	SPP1	ITGAV	0.66344	9	1.11736	34	other
1806	CCL3L1	CCR1	1.11057	9	0.683209	34	cytokine
1814	CCL3	CCR1	1.47929	9	0.683209	34	cytokine
1822	CCL4	CCR1	1.23394	9	0.683209	34	cytokine
929	FN1	TNFRSF11B	0.27521	9	1.60784	38	other
1383	OSM	LIFR	0.745092	9	1.65617	38	other
1419	PLAU	MRC2	0.763456	9	1.01831	38	other
43	HBEGF	CD82	0.640412	9	1.39523	41	growth factor
850	FN1	CD79A	0.27521	9	4.72533	41	other
1024	ICAM1	IL2RG	0.991757	9	1.12785	41	other
1956	IL18	CD48	0.704658	9	0.843972	41	cytokine
116	TGFB1	CD109	0.7696	14	0.49881	9	growth factor
130	TGFB1	ENG	0.7696	14	0.682536	9	growth factor
148	TGFB1	SDC2	0.7696	14	0.235119	9	growth factor
395	BMP2	ENG	1.18107	14	0.682536	9	other
535	COL1A1	ITGA5	1.70618	14	0.549472	9	other
675	CSF1	CSF1R	0.893352	14	0.908407	9	other
719	CYR61	ITGA5	1.2722	14	0.549472	9	other
848	FN1	C5AR1	0.404464	14	1.09056	9	other
881	FN1	ITGA5	0.404464	14	0.549472	9	other
918	FN1	PLAUR	0.404464	14	1.19713	9	other
925	FN1	SDC2	0.404464	14	0.235119	9	other
95	PDGFD	PDGFRA	0.862049	14	1.15658	14	growth factor
149	TGFB1	SDC2	0.7696	14	0.708034	14	growth factor
505	COL1A1	CD36	1.70618	14	0.89822	14	other
519	COL1A1	DDR2	1.70618	14	1.07715	14	other
553	COL1A2	CD36	1.49716	14	0.89822	14	other
855	FN1	COL13A1	0.404464	14	1.00609	14	other
926	FN1	SDC2	0.404464	14	0.708034	14	other
1285	MDK	PTPRZ1	1.26926	14	2.03722	14	other
1465	PTN	PTPRZ1	0.704933	14	2.03722	14	other
101	PGF	FLT1	1.30253	14	6.06385	21	growth factor
109	TGFB1	ACVRL1	0.7696	14	4.2338	21	growth factor
113	TGFB1	CAV1	0.7696	14	4.11351	21	growth factor
133	TGFB1	ENG	0.7696	14	3.27272	21	growth factor
398	BMP2	ENG	1.18107	14	3.27272	21	other
514	COL1A1	CD93	1.70618	14	2.27566	21	other
523	COL1A1	FLT4	1.70618	14	4.1386	21	other
526	COL1A1	ITGA1	1.70618	14	2.6108	21	other
531	COL1A1	ITGA2	1.70618	14	2.64421	21	other
539	COL1A1	ITGA5	1.70618	14	2.77825	21	other
562	COL1A2	CD93	1.49716	14	2.27566	21	other
567	COL1A2	FLT4	1.49716	14	4.1386	21	other
570	COL1A2	ITGA1	1.49716	14	2.6108	21	other
575	COL1A2	ITGA2	1.49716	14	2.64421	21	other
638	COL5A1	ITGA1	0.898876	14	2.6108	21	other
642	COL5A2	ITGA1	1.72014	14	2.6108	21	other
714	CYR61	CAV1	1.2722	14	4.11351	21	other
723	CYR61	ITGA5	1.2722	14	2.77825	21	other
786	EFEMP2	AQP1	0.92382	14	5.18307	21	other
859	FN1	FLT4	0.404464	14	4.1386	21	other
865	FN1	ITGA2	0.404464	14	2.64421	21	other
885	FN1	ITGA5	0.404464	14	2.77825	21	other
889	FN1	ITGA6	0.404464	14	4.75641	21	other
915	FN1	NT5E	0.404464	14	1.08967	21	other
921	FN1	ROBO4	0.404464	14	5.33716	21	other
1270	MDK	ITGA6	1.26926	14	4.75641	21	other
1282	MDK	PTPRB	1.26926	14	5.50171	21	other
1460	PTN	PTPRB	0.704933	14	5.50171	21	other
117	TGFB1	CD109	0.7696	14	1.11104	22	growth factor
123	TGFB1	CXCR4	0.7696	14	2.00878	32	growth factor
506	COL1A1	CD36	1.70618	14	1.20539	33	other
513	COL1A1	CD93	1.70618	14	1.06926	33	other
538	COL1A1	ITGA5	1.70618	14	1.11915	33	other
554	COL1A2	CD36	1.49716	14	1.20539	33	other
561	COL1A2	CD93	1.49716	14	1.06926	33	other
722	CYR61	ITGA5	1.2722	14	1.11915	33	other
849	FN1	C5AR1	0.404464	14	1.85821	33	other
884	FN1	ITGA5	0.404464	14	1.11915	33	other
919	FN1	PLAUR	0.404464	14	1.85512	33	other
118	TGFB1	CD109	0.7696	14	1.75142	34	growth factor
132	TGFB1	ENG	0.7696	14	0.673602	34	growth factor
140	TGFB1	ITGAV	0.7696	14	1.11736	34	growth factor
397	BMP2	ENG	1.18107	14	0.673602	34	other
530	COL1A1	ITGA2	1.70618	14	2.42903	34	other
537	COL1A1	ITGA5	1.70618	14	0.671771	34	other
547	COL1A1	ITGAV	1.70618	14	1.11736	34	other
574	COL1A2	ITGA2	1.49716	14	2.42903	34	other
583	COL1A2	ITGAV	1.49716	14	1.11736	34	other
590	COL1A2	ITGB3	1.49716	14	3.44081	34	other
677	CSF1	CSF1R	0.893352	14	1.51256	34	other
721	CYR61	ITGA5	1.2722	14	0.671771	34	other
736	CYR61	ITGAV	1.2722	14	1.11736	34	other
747	CYR61	ITGB3	1.2722	14	3.44081	34	other
864	FN1	ITGA2	0.404464	14	2.42903	34	other
883	FN1	ITGA5	0.404464	14	0.671771	34	other
898	FN1	ITGAV	0.404464	14	1.11736	34	other
903	FN1	ITGB3	0.404464	14	3.44081	34	other
1000	IBSP	ITGAV	1.26102	14	1.11736	34	other
1290	MDK	SDC1	1.26926	14	1.41955	34	other
1470	PTN	SDC1	0.704933	14	1.41955	34	other
507	COL1A1	CD36	1.70618	14	0.545628	38	other
520	COL1A1	DDR2	1.70618	14	1.06284	38	other
555	COL1A2	CD36	1.49716	14	0.545628	38	other
931	FN1	TNFRSF11B	0.404464	14	1.60784	38	other
1286	MDK	PTPRZ1	1.26926	14	1.4466	38	other
1466	PTN	PTPRZ1	0.704933	14	1.4466	38	other
125	TGFB1	CXCR4	0.7696	14	0.914166	41	growth factor
851	FN1	CD79A	0.404464	14	4.72533	41	other
236	ADAM15	ITGA5	2.86738	21	0.549472	9	other
499	COL18A1	ITGA5	3.15011	21	0.549472	9	other
724	CYR61	ITGA5	0.842294	21	0.549472	9	other
808	EFNB2	PECAM1	3.38979	21	0.652	9	other
835	FBN1	ITGA5	1.99839	21	0.549472	9	other
1324	MMP2	SDC2	1.87539	21	0.235119	9	other
82	PDGFB	PDGFRA	1.66122	21	1.15658	14	growth factor
811	EFNB2	RHBDL2	3.38979	21	1.94176	14	other
983	HSPG2	COL13A1	5.33581	21	1.00609	14	other
1325	MMP2	SDC2	1.87539	21	0.708034	14	other
1354	NID1	COL13A1	2.35277	21	1.00609	14	other
1363	NID2	COL13A1	2.22057	21	1.00609	14	other
87	PDGFB	S1PR1	1.66122	21	1.98902	21	growth factor
181	VEGFC	FLT1	2.02609	21	6.06385	21	growth factor
183	VEGFC	FLT4	2.02609	21	4.1386	21	growth factor
185	VEGFC	KDR	2.02609	21	5.77147	21	growth factor
240	ADAM15	ITGA5	2.86738	21	2.77825	21	other
301	ANGPT2	TEK	3.20818	21	4.23799	21	other
305	ANGPT2	TIE1	3.20818	21	6.5357	21	other
307	ANGPTL2	TIE1	1.78747	21	6.5357	21	other
380	APP	CAV1	2.51917	21	4.11351	21	other
503	COL18A1	ITGA5	3.15011	21	2.77825	21	other
504	COL18A1	KDR	3.15011	21	5.77147	21	other
609	COL4A1	CD93	5.08071	21	2.27566	21	other
611	COL4A1	ITGA1	5.08071	21	2.6108	21	other
614	COL4A1	ITGA2	5.08071	21	2.64421	21	other
623	COL4A2	CD93	4.85752	21	2.27566	21	other
716	CYR61	CAV1	0.842294	21	4.11351	21	other
728	CYR61	ITGA5	0.842294	21	2.77825	21	other
769	DLL1	NOTCH4	2.6651	21	4.85285	21	other
771	DLL4	NOTCH4	4.3114	21	4.85285	21	other
807	EFNB2	EPHB4	3.38979	21	3.084	21	other
810	EFNB2	PECAM1	3.38979	21	3.99835	21	other
839	FBN1	ITGA5	1.99839	21	2.77825	21	other
991	HSPG2	ITGA2	5.33581	21	2.64421	21	other
1128	JAG1	NOTCH4	2.0497	21	4.85285	21	other
1130	JAG2	NOTCH4	3.07757	21	4.85285	21	other
1160	LAMA4	ITGA6	3.00228	21	4.75641	21	other
1165	LAMA5	BCAM	3.49718	21	4.60618	21	other
1168	LAMA5	ITGA2	3.49718	21	2.64421	21	other
1170	LAMA5	ITGA6	3.49718	21	4.75641	21	other
1174	LAMB1	ITGA1	3.83928	21	2.6108	21	other
1177	LAMB1	ITGA2	3.83928	21	2.64421	21	other
1179	LAMB1	ITGA6	3.83928	21	4.75641	21	other
1187	LAMC1	ITGA1	3.05825	21	2.6108	21	other
1193	LAMC1	ITGA2	3.05825	21	2.64421	21	other
1197	LAMC1	ITGA6	3.05825	21	4.75641	21	other
1668	TIMP3	KDR	1.64456	21	5.77147	21	other
239	ADAM15	ITGA5	2.86738	21	1.11915	33	other
454	CD34	SELL	5.28657	21	2.54833	33	other
502	COL18A1	ITGA5	3.15011	21	1.11915	33	other
608	COL4A1	CD93	5.08071	21	1.06926	33	other
622	COL4A2	CD93	4.85752	21	1.06926	33	other
727	CYR61	ITGA5	0.842294	21	1.11915	33	other
809	EFNB2	PECAM1	3.38979	21	1.04344	33	other
838	FBN1	ITGA5	1.99839	21	1.11915	33	other
1429	PODXL	SELL	4.98734	21	2.54833	33	other
78	PDGFB	ITGAV	1.66122	21	1.11736	34	growth factor
238	ADAM15	ITGA5	2.86738	21	0.671771	34	other
256	ADAM15	ITGAV	2.86738	21	1.11736	34	other
267	ADAM15	ITGB3	2.86738	21	3.44081	34	other
501	COL18A1	ITGA5	3.15011	21	0.671771	34	other
613	COL4A1	ITGA2	5.08071	21	2.42903	34	other
617	COL4A1	ITGAV	5.08071	21	1.11736	34	other
726	CYR61	ITGA5	0.842294	21	0.671771	34	other
740	CYR61	ITGAV	0.842294	21	1.11736	34	other
749	CYR61	ITGB3	0.842294	21	3.44081	34	other
778	EDIL3	ITGAV	0.41249	21	1.11736	34	other
837	FBN1	ITGA5	1.99839	21	0.671771	34	other
842	FBN1	ITGAV	1.99839	21	1.11736	34	other
845	FBN1	ITGB3	1.99839	21	3.44081	34	other
990	HSPG2	ITGA2	5.33581	21	2.42903	34	other
997	HSPG2	SDC1	5.33581	21	1.41955	34	other
1163	LAMA4	ITGAV	3.00228	21	1.11736	34	other
1167	LAMA5	ITGA2	3.49718	21	2.42903	34	other
1172	LAMA5	SDC1	3.49718	21	1.41955	34	other
1176	LAMB1	ITGA2	3.83928	21	2.42903	34	other
1182	LAMB1	ITGAV	3.83928	21	1.11736	34	other
1192	LAMC1	ITGA2	3.05825	21	2.42903	34	other
1204	LAMC1	ITGAV	3.05825	21	1.11736	34	other
1359	NID1	ITGAV	2.35277	21	1.11736	34	other
1362	NID1	ITGB3	2.35277	21	3.44081	34	other
1614	TGM2	ITGB3	2.53069	21	3.44081	34	other
812	EFNB2	RHBDL2	3.38979	21	1.42049	38	other
1696	TNFSF10	TNFRSF11B	1.75196	21	1.60784	38	other
1732	VWF	TNFRSF11B	7.68216	21	1.60784	38	other
332	ANXA1	FPR3	0.718082	22	1.21807	9	other
1397	PLAU	ITGA5	1.04982	22	0.549472	9	other
1424	PLAU	PLAUR	1.04982	22	1.19713	9	other
347	APOE	LDLR	0.97209	22	0.534855	14	other
1420	PLAU	MRC2	1.04982	22	1.31407	14	other
313	ANXA1	DYSF	0.718082	22	4.36907	21	other
1401	PLAU	ITGA5	1.04982	22	2.77825	21	other
323	ANXA1	FPR1	0.718082	22	2.30336	33	other
370	APOE	SORL1	0.97209	22	0.991039	33	other
1400	PLAU	ITGA5	1.04982	22	1.11915	33	other
1425	PLAU	PLAUR	1.04982	22	1.85512	33	other
1399	PLAU	ITGA5	1.04982	22	0.671771	34	other
1408	PLAU	ITGAV	1.04982	22	1.11736	34	other
1421	PLAU	MRC2	1.04982	22	1.01831	38	other
334	ANXA1	FPR3	0.511218	32	1.21807	9	other
315	ANXA1	DYSF	0.511218	32	4.36907	21	other
1248	LTB	CD40	3.29866	32	1.18288	21	other
325	ANXA1	FPR1	0.511218	32	2.30336	33	other
44	HBEGF	CD82	0.828629	33	0.464774	9	growth factor
56	HBEGF	CD9	0.828629	33	0.635279	9	growth factor
119	TGFB1	CD109	0.135591	33	0.49881	9	growth factor
134	TGFB1	ENG	0.135591	33	0.682536	9	growth factor
151	TGFB1	SDC2	0.135591	33	0.235119	9	growth factor
338	ANXA1	FPR3	0.819327	33	1.21807	9	other
1037	ICAM1	ITGAX	1.12979	33	0.933669	9	other
152	TGFB1	SDC2	0.135591	33	0.708034	14	growth factor
1384	OSM	LIFR	1.68724	33	1.67212	14	other
59	HBEGF	CD9	0.828629	33	0.770644	21	growth factor
111	TGFB1	ACVRL1	0.135591	33	4.2338	21	growth factor
115	TGFB1	CAV1	0.135591	33	4.11351	21	growth factor
137	TGFB1	ENG	0.135591	33	3.27272	21	growth factor
165	VEGFA	FLT1	1.45113	33	6.06385	21	growth factor
175	VEGFA	KDR	1.45113	33	5.77147	21	growth factor
319	ANXA1	DYSF	0.819327	33	4.36907	21	other
1011	ICAM1	CAV1	1.12979	33	4.11351	21	other
1448	PTGS2	CAV1	1.07231	33	4.11351	21	other
120	TGFB1	CD109	0.135591	33	1.11104	22	growth factor
127	TGFB1	CXCR4	0.135591	33	2.00878	32	growth factor
1030	ICAM1	IL2RG	1.12979	33	1.47541	32	other
329	ANXA1	FPR1	0.819327	33	2.30336	33	other
1038	ICAM1	ITGAX	1.12979	33	2.03665	33	other
1725	VCAN	SELL	2.53854	33	2.54833	33	other
57	HBEGF	CD9	0.828629	33	0.555784	34	growth factor
121	TGFB1	CD109	0.135591	33	1.75142	34	growth factor
136	TGFB1	ENG	0.135591	33	0.673602	34	growth factor
144	TGFB1	ITGAV	0.135591	33	1.11736	34	growth factor
172	VEGFA	ITGAV	1.45113	33	1.11736	34	growth factor
1385	OSM	LIFR	1.68724	33	1.65617	38	other
47	HBEGF	CD82	0.828629	33	1.39523	41	growth factor
129	TGFB1	CXCR4	0.135591	33	0.914166	41	growth factor
1032	ICAM1	IL2RG	1.12979	33	1.12785	41	other
1554	SPP1	ITGA5	1.11711	34	0.549472	9	other
350	APOE	LDLR	0.948228	34	0.534855	14	other
1558	SPP1	ITGA5	1.11711	34	2.77825	21	other
1576	SPP1	S1PR1	1.11711	34	1.98902	21	other
373	APOE	SORL1	0.948228	34	0.991039	33	other
1557	SPP1	ITGA5	1.11711	34	1.11915	33	other
1556	SPP1	ITGA5	1.11711	34	0.671771	34	other
1569	SPP1	ITGAV	1.11711	34	1.11736	34	other
1612	TGM2	ITGB3	0.702719	34	3.44081	34	other
399	BMP2	ENG	0.943956	38	0.682536	9	other
540	COL1A1	ITGA5	1.51252	38	0.549472	9	other
681	CSF1	CSF1R	0.720635	38	0.908407	9	other
729	CYR61	ITGA5	1.0353	38	0.549472	9	other
508	COL1A1	CD36	1.51252	38	0.89822	14	other
521	COL1A1	DDR2	1.51252	38	1.07715	14	other
556	COL1A2	CD36	1.06471	38	0.89822	14	other
1287	MDK	PTPRZ1	1.33212	38	2.03722	14	other
1467	PTN	PTPRZ1	1.9444	38	2.03722	14	other
107	PGF	FLT1	1.19253	38	6.06385	21	growth factor
402	BMP2	ENG	0.943956	38	3.27272	21	other
518	COL1A1	CD93	1.51252	38	2.27566	21	other
524	COL1A1	FLT4	1.51252	38	4.1386	21	other
528	COL1A1	ITGA1	1.51252	38	2.6108	21	other
534	COL1A1	ITGA2	1.51252	38	2.64421	21	other
544	COL1A1	ITGA5	1.51252	38	2.77825	21	other
566	COL1A2	CD93	1.06471	38	2.27566	21	other
568	COL1A2	FLT4	1.06471	38	4.1386	21	other
572	COL1A2	ITGA1	1.06471	38	2.6108	21	other
578	COL1A2	ITGA2	1.06471	38	2.64421	21	other
644	COL5A2	ITGA1	1.51081	38	2.6108	21	other
718	CYR61	CAV1	1.0353	38	4.11351	21	other
733	CYR61	ITGA5	1.0353	38	2.77825	21	other
787	EFEMP2	AQP1	1.05298	38	5.18307	21	other
1272	MDK	ITGA6	1.33212	38	4.75641	21	other
1284	MDK	PTPRB	1.33212	38	5.50171	21	other
1462	PTN	PTPRB	1.9444	38	5.50171	21	other
509	COL1A1	CD36	1.51252	38	1.20539	33	other
517	COL1A1	CD93	1.51252	38	1.06926	33	other
543	COL1A1	ITGA5	1.51252	38	1.11915	33	other
557	COL1A2	CD36	1.06471	38	1.20539	33	other
565	COL1A2	CD93	1.06471	38	1.06926	33	other
732	CYR61	ITGA5	1.0353	38	1.11915	33	other
401	BMP2	ENG	0.943956	38	0.673602	34	other
533	COL1A1	ITGA2	1.51252	38	2.42903	34	other
542	COL1A1	ITGA5	1.51252	38	0.671771	34	other
551	COL1A1	ITGAV	1.51252	38	1.11736	34	other
577	COL1A2	ITGA2	1.06471	38	2.42903	34	other
587	COL1A2	ITGAV	1.06471	38	1.11736	34	other
592	COL1A2	ITGB3	1.06471	38	3.44081	34	other
683	CSF1	CSF1R	0.720635	38	1.51256	34	other
731	CYR61	ITGA5	1.0353	38	0.671771	34	other
744	CYR61	ITGAV	1.0353	38	1.11736	34	other
751	CYR61	ITGB3	1.0353	38	3.44081	34	other
1126	ITGB3BP	ITGB3	1.30334	38	3.44081	34	other
1292	MDK	SDC1	1.33212	38	1.41955	34	other
1472	PTN	SDC1	1.9444	38	1.41955	34	other
510	COL1A1	CD36	1.51252	38	0.545628	38	other
522	COL1A1	DDR2	1.51252	38	1.06284	38	other
558	COL1A2	CD36	1.06471	38	0.545628	38	other
1288	MDK	PTPRZ1	1.33212	38	1.4466	38	other
1468	PTN	PTPRZ1	1.9444	38	1.4466	38	other
1252	LTB	CD40	2.05056	41	1.18288	21	other

## Sheet: os6_lr
	ligand	receptor	cell_from_mean_exprs	cell_from	cell_to_mean_exprs	cell_to	comm_type
1000	EFNA1	EPHA2	1.20173	5	1.13981	18	other
1634	NCAM1	FGFR1	0.752161	5	1.26761	25	other
340	ANGPT1	ITGA5	1.04948	5	1.78322	39	other
345	ANGPT1	TEK	1.04948	5	5.71448	39	other
348	ANGPT1	TIE1	1.04948	5	4.76918	39	other
467	BMP2	ENG	1.04077	5	4.02157	39	other
1361	JAG2	NOTCH4	1.08533	5	4.04784	39	other
1290	ICAM1	ITGAX	1.05985	12	0.843747	12	other
2221	IL18	CD48	1.03461	12	1.0997	12	cytokine
494	CD14	ITGA4	1.27113	12	0.547384	18	other
2291	IL1B	IL1R1	1.50825	12	1.63441	25	cytokine
1282	ICAM1	IL2RG	1.05985	12	2.08464	19	other
2211	IL18	CD48	1.03461	12	1.39761	19	cytokine
495	CD14	ITGA4	1.27113	12	0.697763	43	other
1285	ICAM1	IL2RG	1.05985	12	2.05159	43	other
2251	IL18	CD48	1.03461	12	0.641512	43	cytokine
2002	TNFSF13B	TNFRSF17	1.50027	12	4.11856	24	other
1283	ICAM1	IL2RG	1.05985	12	0.946681	40	other
2231	IL18	CD48	1.03461	12	1.03559	40	cytokine
1267	ICAM1	CAV1	1.05985	12	0.83616	42	other
1284	ICAM1	IL2RG	1.05985	12	0.479557	42	other
1739	PTGS2	CAV1	1.0258	12	0.83616	42	other
2004	TNFSF13B	TNFRSF17	1.50027	12	6.13836	42	other
2241	IL18	CD48	1.03461	12	0.391452	42	cytokine
475	C1QA	CD93	1.25336	12	1.58813	39	other
1268	ICAM1	CAV1	1.05985	12	3.49661	39	other
1740	PTGS2	CAV1	1.0258	12	3.49661	39	other
1003	EFNA1	EPHA2	0.701004	18	1.13981	18	other
2042	VCAN	ITGA4	0.621976	18	0.547384	18	other
2043	VCAN	ITGA4	0.621976	18	0.697763	43	other
2052	VCAN	SELL	0.621976	18	3.12859	40	other
915	CYR61	CAV1	1.24493	18	0.83616	42	other
342	ANGPT1	ITGA5	1.17548	18	1.78322	39	other
346	ANGPT1	TEK	1.17548	18	5.71448	39	other
349	ANGPT1	TIE1	1.17548	18	4.76918	39	other
659	COL1A2	CD36	0.735269	18	2.25563	39	other
666	COL1A2	CD93	0.735269	18	1.58813	39	other
916	CYR61	CAV1	1.24493	18	3.49661	39	other
924	CYR61	ITGA5	1.24493	18	1.78322	39	other
55	FGF7	FGFR3	4.81535	25	1.23222	5	growth factor
307	ADAM12	SDC4	2.43233	25	0.407258	5	other
435	APP	GPC1	1.07984	25	0.844967	5	other
1540	MDK	PTPRZ1	1.85284	25	0.957845	5	other
1566	MDK	SDC4	1.85284	25	0.407258	5	other
1754	PTN	PTPRZ1	3.0371	25	0.957845	5	other
1808	SLIT2	GPC1	3.06428	25	0.844967	5	other
1813	SLIT2	ROBO2	3.06428	25	1.08809	5	other
1923	THBS1	SDC4	2.668	25	0.407258	5	other
1965	TNC	PTPRZ1	3.47817	25	0.957845	5	other
1969	TNC	SDC4	3.47817	25	0.407258	5	other
17210	CXCL12	SDC4	3.98612	25	0.407258	5	cytokine
418	APP	CD74	1.07984	25	1.67416	12	other
1084	FN1	C5AR1	2.10799	25	1.09165	12	other
1160	FN1	PLAUR	2.10799	25	1.57603	12	other
308	ADAM12	SDC4	2.43233	25	0.750449	18	other
436	APP	GPC1	1.07984	25	1.13177	18	other
607	COL1A1	DDR2	1.96719	25	0.775879	18	other
739	COL3A1	DDR2	3.10275	25	0.775879	18	other
1109	FN1	ITGA4	2.10799	25	0.547384	18	other
1164	FN1	SDC2	2.10799	25	1.27019	18	other
1169	FN1	TNFRSF11B	2.10799	25	1.38928	18	other
1517	MDK	ITGA4	1.85284	25	0.547384	18	other
1567	MDK	SDC4	1.85284	25	0.750449	18	other
1606	MMP2	SDC2	2.73651	25	1.27019	18	other
1809	SLIT2	GPC1	3.06428	25	1.13177	18	other
1814	SLIT2	ROBO2	3.06428	25	1.07402	18	other
1899	THBS1	ITGA4	2.668	25	0.547384	18	other
1924	THBS1	SDC4	2.668	25	0.750449	18	other
1928	THBS1	TNFRSF11B	2.668	25	1.38928	18	other
1930	THBS2	ITGA4	4.01773	25	0.547384	18	other
1970	TNC	SDC4	3.47817	25	0.750449	18	other
2012	VCAM1	ITGA4	3.55307	25	0.547384	18	other
2048	VCAN	ITGA4	2.84573	25	0.547384	18	other
17310	CXCL12	SDC4	3.98612	25	0.750449	18	cytokine
52	FGF7	FGFR1	4.81535	25	1.26761	25	growth factor
56	FGF7	FGFR3	4.81535	25	1.19592	25	growth factor
99	IGFBP4	FZD8	1.96657	25	3.3958	25	growth factor
608	COL1A1	DDR2	1.96719	25	2.53178	25	other
740	COL3A1	DDR2	3.10275	25	2.53178	25	other
1165	FN1	SDC2	2.10799	25	1.01966	25	other
1607	MMP2	SDC2	2.73651	25	1.01966	25	other
16210	CXCL12	CXCR4	3.98612	25	2.09954	19	cytokine
1110	FN1	ITGA4	2.10799	25	0.697763	43	other
1518	MDK	ITGA4	1.85284	25	0.697763	43	other
1900	THBS1	ITGA4	2.668	25	0.697763	43	other
1931	THBS2	ITGA4	4.01773	25	0.697763	43	other
2013	VCAM1	ITGA4	3.55307	25	0.697763	43	other
2049	VCAN	ITGA4	2.84573	25	0.697763	43	other
15710	CXCL12	CXCR3	3.98612	25	2.34648	43	cytokine
16610	CXCL12	CXCR4	3.98612	25	1.80203	43	cytokine
1086	FN1	CD79A	2.10799	25	3.92806	24	other
1254	HSPG2	SDC1	1.75045	25	1.54742	24	other
1484	LPL	SDC1	2.93027	25	1.54742	24	other
1548	MDK	SDC1	1.85284	25	1.54742	24	other
1755	PTN	SDC1	3.0371	25	1.54742	24	other
1816	SLIT2	SDC1	3.06428	25	1.54742	24	other
1918	THBS1	SDC1	2.668	25	1.54742	24	other
1966	TNC	SDC1	3.47817	25	1.54742	24	other
419	APP	CD74	1.07984	25	1.59362	40	other
529	CFH	SELL	2.45539	25	3.12859	40	other
1087	FN1	CD79A	2.10799	25	4.07404	40	other
2062	VCAN	SELL	2.84573	25	3.12859	40	other
16410	CXCL12	CXCR4	3.98612	25	1.10295	40	cytokine
400	APP	CAV1	1.07984	25	0.83616	42	other
918	CYR61	CAV1	1.51473	25	0.83616	42	other
1088	FN1	CD79A	2.10799	25	2.78755	42	other
1149	FN1	ITGB7	2.10799	25	1.57343	42	other
2023	VCAM1	ITGB7	3.55307	25	1.57343	42	other
15610	CXCL12	CXCR3	3.98612	25	1.57576	42	cytokine
2	CTGF	ITGA5	2.78845	25	1.78322	39	growth factor
401	APP	CAV1	1.07984	25	3.49661	39	other
596	COL1A1	CD36	1.96719	25	2.25563	39	other
602	COL1A1	CD93	1.96719	25	1.58813	39	other
644	COL1A1	ITGA5	1.96719	25	1.78322	39	other
662	COL1A2	CD36	2.34742	25	2.25563	39	other
668	COL1A2	CD93	2.34742	25	1.58813	39	other
853	COL6A1	ITGA6	1.59305	25	3.75928	39	other
919	CYR61	CAV1	1.51473	25	3.49661	39	other
926	CYR61	ITGA5	1.51473	25	1.78322	39	other
1065	FBN1	ITGA5	3.46503	25	1.78322	39	other
1115	FN1	ITGA5	2.10799	25	1.78322	39	other
1119	FN1	ITGA6	2.10799	25	3.75928	39	other
1162	FN1	ROBO4	2.10799	25	5.10059	39	other
1393	LAMA4	ITGA6	1.70691	25	3.75928	39	other
1430	LAMB1	ITGA6	1.6122	25	3.75928	39	other
1527	MDK	ITGA6	1.85284	25	3.75928	39	other
1536	MDK	PTPRB	1.85284	25	5.17594	39	other
1751	PTN	PTPRB	3.0371	25	5.17594	39	other
1815	SLIT2	ROBO4	3.06428	25	5.10059	39	other
1892	THBS1	CD36	2.668	25	2.25563	39	other
1904	THBS1	ITGA6	2.668	25	3.75928	39	other
1933	THBS2	ITGA6	4.01773	25	3.75928	39	other
1936	THBS2	NOTCH4	4.01773	25	4.04784	39	other
1954	TNC	ITGA5	3.47817	25	1.78322	39	other
1964	TNC	PTPRB	3.47817	25	5.17594	39	other
11210	CCL5	SDC4	2.1512	19	0.407258	5	cytokine
11310	CCL5	SDC4	2.1512	19	0.750449	18	cytokine
10110	CCL5	CXCR3	2.1512	19	2.34648	43	cytokine
10610	CCL5	SDC1	2.1512	19	1.54742	24	cytokine
10010	CCL5	CXCR3	2.1512	19	1.57576	42	cytokine
1499	LTB	CD40	1.83732	19	1.14795	39	other
11410	CCL5	SDC4	2.28208	43	0.407258	5	cytokine
11510	CCL5	SDC4	2.28208	43	0.750449	18	cytokine
10510	CCL5	CXCR3	2.28208	43	2.34648	43	cytokine
19110	CXCL13	CXCR3	4.18654	43	2.34648	43	cytokine
10910	CCL5	SDC1	2.28208	43	1.54742	24	cytokine
10410	CCL5	CXCR3	2.28208	43	1.57576	42	cytokine
19010	CXCL13	CXCR3	4.18654	43	1.57576	42	cytokine
1504	LTB	CD40	2.77227	40	1.14795	39	other
438	APP	GPC1	2.33043	39	0.844967	5	other
575	COL18A1	GPC1	1.46083	39	0.844967	5	other
1859	TFPI	SDC4	1.97944	39	0.407258	5	other
1885	TGM2	SDC4	1.78445	39	0.407258	5	other
424	APP	CD74	2.33043	39	1.67416	12	other
1085	FN1	C5AR1	1.05086	39	1.09165	12	other
1161	FN1	PLAUR	1.05086	39	1.57603	12	other
439	APP	GPC1	2.33043	39	1.13177	18	other
576	COL18A1	GPC1	1.46083	39	1.13177	18	other
580	COL18A1	GPC4	1.46083	39	1.07613	18	other
1006	EFNA1	EPHA2	0.817469	39	1.13981	18	other
1112	FN1	ITGA4	1.05086	39	0.547384	18	other
1166	FN1	SDC2	1.05086	39	1.27019	18	other
1171	FN1	TNFRSF11B	1.05086	39	1.38928	18	other
1608	MMP2	SDC2	1.11372	39	1.27019	18	other
1860	TFPI	SDC4	1.97944	39	0.750449	18	other
1871	TGM2	ITGA4	1.78445	39	0.547384	18	other
1886	TGM2	SDC4	1.78445	39	0.750449	18	other
1984	TNFSF10	TNFRSF11B	1.18842	39	1.38928	18	other
2071	VWF	TNFRSF11B	7.38864	39	1.38928	18	other
101	IGFBP4	FZD8	2.90717	39	3.3958	25	growth factor
1167	FN1	SDC2	1.05086	39	1.01966	25	other
1609	MMP2	SDC2	1.11372	39	1.01966	25	other
1113	FN1	ITGA4	1.05086	39	0.697763	43	other
1872	TGM2	ITGA4	1.78445	39	0.697763	43	other
1089	FN1	CD79A	1.05086	39	3.92806	24	other
1257	HSPG2	SDC1	4.23888	39	1.54742	24	other
425	APP	CD74	2.33043	39	1.59362	40	other
501	CD34	SELL	4.31399	39	3.12859	40	other
1090	FN1	CD79A	1.05086	39	4.07404	40	other
1732	PODXL	SELL	4.38007	39	3.12859	40	other
403	APP	CAV1	2.33043	39	0.83616	42	other
1091	FN1	CD79A	1.05086	39	2.78755	42	other
1154	FN1	ITGB7	1.05086	39	1.57343	42	other
310	ADAM15	ITGA5	1.96451	39	1.78322	39	other
404	APP	CAV1	2.33043	39	3.49661	39	other
585	COL18A1	ITGA5	1.46083	39	1.78322	39	other
587	COL18A1	KDR	1.46083	39	5.1502	39	other
748	COL4A1	CD93	3.60126	39	1.58813	39	other
774	COL4A2	CD93	3.48747	39	1.58813	39	other
1117	FN1	ITGA5	1.05086	39	1.78322	39	other
1121	FN1	ITGA6	1.05086	39	3.75928	39	other
1163	FN1	ROBO4	1.05086	39	5.10059	39	other
1395	LAMA4	ITGA6	2.22205	39	3.75928	39	other
1432	LAMB1	ITGA6	2.13652	39	3.75928	39	other
